# Supplementary material for: Significant Associations of Neurological Complications of Herpes Zoster With Stroke in Rheumatoid Arthritis Patients
Source: PubMed Central journal article supplement (PMC5586320; doi:10.1161/jaha.117.006304), 2017-07-19
Supplement: JAH3-6-e006304-s001.pdf [file JAH3-6-e006304-s001.pdf]

# **Supplemental Material**

**Table S1.** ICD-9-CM codes for herpes zoster (HZ) categories

| HZ subgroup                       | ICD-code | Description                                                |
|-----------------------------------|----------|------------------------------------------------------------|
| HZ with neurological complication | 053.0    | Herpes zoster with meningitis                              |
|                                   | 053.10   | Herpes zoster with unspecified nervous system complication |
|                                   | 053.12   | Postherpetic trigeminal neuralgia                          |
|                                   | 053.13   | Postherpetic polyneuropathy                                |
|                                   | 053.14   | Herpes zoster myelitis                                     |
|                                   | 053.19   | Herpes zoster with other nervous system complications      |
| HZ with cranial complication      | 053.11   | Geniculate herpes zoster                                   |
|                                   | 053.20   | Herpes zoster dermatitis of eyelid                         |
|                                   | 053.21   | Herpes zoster keratoconjunctivitis                         |
|                                   | 053.22   | Herpes zoster iridocyclitis                                |
|                                   | 053.29   | Herpes zoster with other ophthalmic complications          |
|                                   | 053.71   | Otitis externa due to herpes zoster                        |
| HZ with other complication        | 053.79   | Herpes zoster with other specified complications           |
|                                   | 053.8    | Herpes zoster with unspecified complication                |
| HZ without complication           | 053.9    | Herpes zoster without complication                         |

**Table S2.** Multivariable analysis of baseline factors for rheumatoid arthritis (RA) patients with new-onset herpes zoster (HZ)

| Variable  | RA cohort |              |                 | Non-RA cohort |              |                 | Adjusted HR <sup>†</sup><br>(95% CI) | P value           |
|-----------|-----------|--------------|-----------------|---------------|--------------|-----------------|--------------------------------------|-------------------|
|           | Event     | person-years | Incidence rate* | Event         | person-years | Incidence rate* |                                      |                   |
| Overall   | 2,892     | 158,161      | 18.3            | 4,936         | 683,102      | 7.2             | 2.53(2.42–2.65)                      | <b>&lt;0.0001</b> |
| Age group |           |              |                 |               |              |                 |                                      |                   |
| <45       | 463       | 47,786       | 9.7             | 541           | 197,344      | 2.7             | 3.43 (3.03–3.88)                     | <b>&lt;0.0001</b> |
| 45-64     | 1,620     | 80,503       | 20.1            | 2,927         | 344,074      | 8.5             | 2.33 (2.19–2.48)                     | <b>&lt;0.0001</b> |
| ≥65       | 809       | 29,872       | 27.1            | 1,468         | 141,684      | 10.4            | 2.56 (2.35–2.79)                     | <b>&lt;0.0001</b> |
| Sex       |           |              |                 |               |              |                 |                                      |                   |
| Female    | 2,275     | 124,890      | 18.2            | 3,957         | 535,537      | 7.4             | 2.48 (2.36–2.62)                     | <b>&lt;0.0001</b> |
| Male      | 617       | 33,270       | 18.5            | 979           | 147,566      | 6.6             | 2.81 (2.54–3.11)                     | <b>&lt;0.0001</b> |

\*per 1,000 person-years.

<sup>†</sup>Adjusted for age, sex, atrial fibrillation, chronic kidney disease, chronic obstructive pulmonary disease, diabetes mellitus, dyslipidemia and hypertension.

**Table S3.** Multivariable analysis for risk for hospitalization and death among rheumatoid arthritis (RA) patients with and without herpes zoster (HZ)

| Variable               | Event | person-years | Incidence rate<br>(per 1,000<br>person-years) | Crude HR<br>(95% CI) | <i>P</i> value    | Adjusted HR*<br>(95% CI) | <i>P</i> value    |
|------------------------|-------|--------------|-----------------------------------------------|----------------------|-------------------|--------------------------|-------------------|
| <b>Hospitalization</b> |       |              |                                               |                      |                   |                          |                   |
| RA without HZ          | 2,557 | 14,677       | 174                                           | 1.0 (reference)      |                   | 1.0 (reference)          |                   |
| RA with HZ             | 1,535 | 6,343        | 242                                           | 1.36 (1.28-1.45)     | <b>&lt;0.0001</b> | 1.36 (1.28–1.45)         | <b>&lt;0.0001</b> |
| <b>Mortality</b>       |       |              |                                               |                      |                   |                          |                   |
| RA without HZ          | 584   | 21,566       | 27.1                                          | 1.0 (reference)      |                   | 1.0 (reference)          |                   |
| RA with HZ             | 338   | 10,696       | 31.6                                          | 1.17 (1.02–1.33)     | <b>&lt;0.024</b>  | 1.18 (1.03–1.34)         | <b>0.026</b>      |

\*Adjusted for age, sex, atrial fibrillation, chronic kidney disease, chronic obstructive pulmonary disease, diabetes mellitus, dyslipidemia and hypertension.

**Table S4.** Incidence rate of stroke among rheumatoid arthritis (RA) patients with or without herpes zoster (HZ) infection

|                    | RA without HZ infection |              |                 | RA with HZ infection |              |                 | Adjusted HR <sup>†</sup><br>(95% CI) | P value     |
|--------------------|-------------------------|--------------|-----------------|----------------------|--------------|-----------------|--------------------------------------|-------------|
|                    | Event                   | person-years | Incidence rate* | Event                | person-years | Incidence rate* |                                      |             |
| <b>0-90 day</b>    | 14                      | 1,336        | 105.0           | 17                   | 672          | 253.0           | 2.30 (1.13–4.69)                     | <b>0.02</b> |
| <b>91-365 day</b>  | 31                      | 3,655        | 84.8            | 17                   | 1,818        | 93.5            | 1.05 (0.58–1.90)                     | 0.87        |
| <b>366-730 day</b> | 41                      | 4,065        | 101.0           | 24                   | 2,006        | 120.0           | 1.16 (0.70–1.92)                     | 0.56        |
| <b>&gt;730 day</b> | 100                     | 11,310       | 88.4            | 58                   | 5,487        | 106.0           | 1.18 (0.86–1.64)                     | 0.31        |

\*per 1,000 person-years.

<sup>†</sup>Adjusted for age, sex, atrial fibrillation, chronic kidney disease, chronic obstructive pulmonary disease, diabetes mellitus, dyslipidemia and hypertension.

**Table S5.** Association between medications used and herpes zoster (HZ) among rheumatoid arthritis patients (n= 8,353)

| Variable                                                 | HZ case<br>N = 2,798 | Control<br>N = 5,555 | Crude OR<br>(95% CI) | <i>P</i> value    | Adjusted OR*<br>(95% CI) | <i>P</i> value    |
|----------------------------------------------------------|----------------------|----------------------|----------------------|-------------------|--------------------------|-------------------|
| NSAID alone                                              | 91 (3.3)             | 294 (5.3)            | reference            |                   | reference                |                   |
| NSAID + csDMARDs                                         | 173 (6.2)            | 559 (10.1)           | 1.00 (0.75-1.34)     | 0.99              | 1.00 (0.75-1.34)         | 0.99              |
| NSAID + corticosteroids ≤ 5 mg/day                       | 254 (9.1)            | 619 (11.1)           | 1.33 (1.01-1.75)     | <b>0.04</b>       | 1.31 (0.99-1.73)         | 0.05              |
| NSAID + corticosteroids > 5 mg/day                       | 95 (3.4)             | 156 (2.8)            | 1.97 (1.39-2.78)     | <b>0.0001</b>     | 1.95 (1.38-2.76)         | <b>0.0002</b>     |
| NSAID + more than one group of immunosuppressive agents† | 2185 (78.1)          | 3927 (70.7)          | 1.80 (1.41-2.29)     | <b>&lt;0.0001</b> | 1.79 (1.41-2.28)         | <b>&lt;0.0001</b> |

\*Adjusted for age, sex, atrial fibrillation, chronic kidney disease, chronic obstructive pulmonary disease, diabetes mellitus dyslipidemia and hypertension.

†Including conventional synthetic disease-modifying anti-rheumatic drugs (csDMARDs), corticosteroids, and biologics.
